# Supplementary material
Source: Springer Nature journal article supplement (https://www.springermedizin.de/resource/supplementary/12970_2014_460_MOESM5_ESM.pdf/9593998)

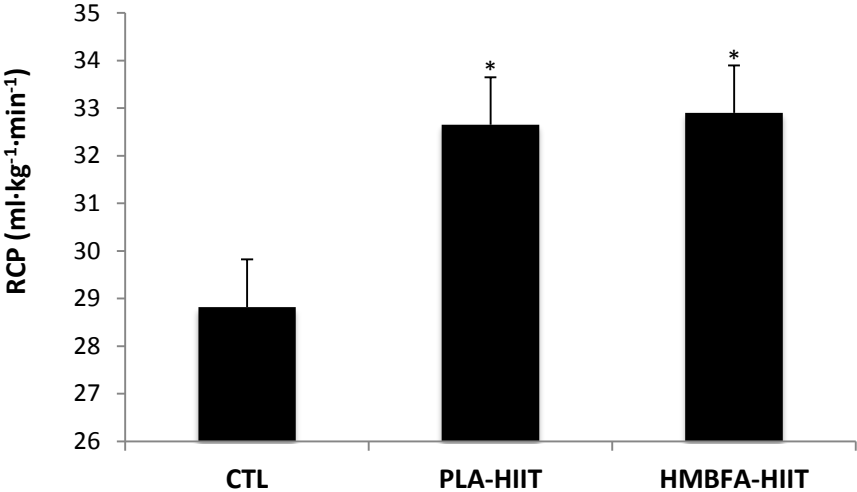

Supplement: MOESM5 [file 9593998]
